# Supplementary material for: Pathogen and host genotype differently affect pathogen fitness through their effects on different life-history stages
Source: PubMed Central journal article supplement (PMC3483255; doi:10.1186/1471-2148-12-135), 2012-08-02
Supplement: 1471-2148-12-135-S2.pdf [file 1471-2148-12-135-S2.pdf]

**Additional file 2. Summary of ANCOVA results for total spore production for datasets with either of the Pendek or Pc38 host genotypes excluded.**

|                  | Pendek38 excluded |                   |          |     | Pendek excluded |                   |          |     |
|------------------|-------------------|-------------------|----------|-----|-----------------|-------------------|----------|-----|
| <b>Source</b>    | <b>DF</b>         | <b>Type II SS</b> | <b>F</b> |     | <b>DF</b>       | <b>Type II SS</b> | <b>F</b> |     |
| Block            | 1                 | 2.747             | 7.733    | *** | 1               | 2.882             | 7.890    | *** |
| Pathogen         | 4                 | 3.965             | 2.790    | *   | 4               | 4.026             | 2.755    | *   |
| Whole plot error | 44                | 15.630            | 2.664    | *   | 44              | 15.343            | 4.951    | *   |
| Inoculum dose    | 1                 | 0.538             | 4.032    |     | 1               | 0.304             | 4.120    |     |
| Host             | 3                 | 2.700             | 6.748    | *** | 3               | 2.695             | 12.173   | *** |
| Pathogen * Host  | 12                | 1.332             | 0.832    |     | 12              | 2.676             | 3.022    | *   |
| Split plot error | 12                | 1.600             |          |     | 13              | 0.959             |          |     |

Both the response variable, total spore production (mg per cm<sup>2</sup> of leaf tissue) and the covariate, inoculum dose (spores deposited per cm<sup>2</sup>), were log transformed.

Asterisks indicate significance at  $p < 0.05$ , 0.01, and 0.001, respectively.

Significance of model effects do not differ from the full model with all 5 host lines included (Table 3).
