# Supplementary material for: Pathogen and host genotype differently affect pathogen fitness through their effects on different life-history stages
Source: PubMed Central journal article supplement (PMC3483255; doi:10.1186/1471-2148-12-135), 2012-08-02
Supplement: 1471-2148-12-135-S3.pdf [file 1471-2148-12-135-S3.pdf]

**Additional file 3. Summary of ANCOVA results for latent period for datasets with either of the Pendek or Pendek38 host genotypes excluded.**

| Source           | Pendek 38 excluded |            |       |     | Pendek excluded |            |       |     |
|------------------|--------------------|------------|-------|-----|-----------------|------------|-------|-----|
|                  | DF                 | Type II SS | F     |     | DF              | Type II SS | F     |     |
| Block            | 1                  | 6.7669     | 23.46 | *** | 1               | 6.8069     | 19.28 | *** |
| Pathogen         | 4                  | 4.0439     | 3.51  | *   | 4               | 3.2353     | 2.29  |     |
| Whole plot error | 44                 | 12.6894    | 4.02  | *   | 44              | 15.5334    | 3.69  | *   |
| Pustule density  | 1                  | 0.1164     | 1.62  |     | 1               | 0.9878     | 10.31 | **  |
| Host             | 3                  | 7.2406     | 33.68 | *** | 3               | 5.0688     | 17.64 | *** |
| Host * density   | 3                  | 0.7613     | 3.54  | *   | 3               | 1.1238     | 3.91  | *   |
| Pathogen * Host  | 12                 | 0.9853     | 1.15  |     | 12              | 1.2898     | 1.12  |     |
| Split plot error | 10                 | 0.7166     |       |     | 10              | 0.9577     |       |     |

Latent period was measured as days until 50% of the pustules were sporulating and log transformed pustule density (pustules per cm<sup>2</sup> of leaf tissue) was used as a covariate. Asterisks indicate significance at  $p < 0.05$ , 0.01, and 0.001, respectively. Significance of pathogen and host effects do not change from the full model with all 5 cultivars (Table 5). The effect of pathogen genotype is not significant ( $p=0.075$ ) when Pendek is excluded from the model.
